# Supplementary material for: D-Limonene Promotes Anti-Obesity in 3T3-L1 Adipocytes and High-Calorie Diet-Induced Obese Rats by Activating the AMPK Signaling Pathway
Source: MDPI journal article supplement (doi:10.3390/nu15020267), 2023-01-04
Supplement: s1 [file s1]

**Supplementary Table S2.** Specific primer of qPCR analysis in high-calorie diet-induced obese rats.

| <b>Gene</b>                    | <b>Primer sequence (5'-3')</b> | <b>Reference<br/>(NCBI GenBank)</b> |
|--------------------------------|--------------------------------|-------------------------------------|
| <i>β-actin</i>                 | F-AGGCCCTCTGAACCCTAAG          | NM031144.3                          |
|                                | R-CAGCCTGGATGGCTACGTACA        |                                     |
| <i>ACC</i>                     | F- GCTGGGACAAAGAACCATCC        | NM022193.1                          |
|                                | R- TCCGTTGTTGTGCATTATCTGG      |                                     |
| <i>AMPK</i>                    | F-GTGGATCGCCAAATTATGCA         | NM023991.1                          |
|                                | R-AACCTCAGGACCCGCATACA         |                                     |
| <i>ATGL</i>                    | F-GGCCACTGCCATGATGGTA          | NM001108509.2                       |
|                                | R-GCAGCCACTCCAACAAACG          |                                     |
| <i>FAS</i>                     | F-TCTCCTGTTGACCCAGAGCAT        | NM017332.1                          |
|                                | R-TGGGCCAGAATGGCATCT           |                                     |
| <i>HSL</i>                     | F-GTCACGCTACATAAAGGCTGCTT      | NM012598.1                          |
|                                | R-CAGCCCGATGGAGAGAGTCT         |                                     |
| <i>PPAR<math>\gamma</math></i> | F-AAGTTTGAGTTTGCTGTGAAGTTCA    | NM001145366.1                       |
|                                | R-CGATGGGCTTCACGTTTCA          |                                     |
| <i>SREBP-1c</i>                | F-CGGGACAGCTTAGCCTCTACA        | NM001276707.1                       |
|                                | R-CGGCCACAAGAAGTAGATCA         |                                     |
