# Supplementary material for: D-Limonene Promotes Anti-Obesity in 3T3-L1 Adipocytes and High-Calorie Diet-Induced Obese Rats by Activating the AMPK Signaling Pathway
Source: MDPI journal article supplement (doi:10.3390/nu15020267), 2023-01-04
Supplement: s1 [file s1]

**Supplementary Table S1.** Specific primer of qPCR analysis in 3T3-L1 adipocytes.

| Gene                            | Primer sequence (5'-3')     | Reference<br>(NCBI GenBank) |
|---------------------------------|-----------------------------|-----------------------------|
| <i><math>\beta</math>-actin</i> | F-TCTGGCACACACCTTCTACAA     | NM007393.5                  |
|                                 | R-TTTTCACGGTTGGCCTTAGG      |                             |
| <i>ACC</i>                      | F-TTGCAGAAGAAATACGCCATATGT  | NM133360.2                  |
|                                 | R-AGGGCACTGACTCTCTTATAATCCT |                             |
| <i>ATGL</i>                     | F-ACTCACATCTACGGAGCCTCG     | NM001163689.1               |
|                                 | R-TCCTTGGACACCTCAATAATGTTG  |                             |
| <i>C/EBP<math>\alpha</math></i> | F-CTGGAGTTGACCAGTGACAATGA   | NM001287514.1               |
|                                 | R-AGTTGCCCATGGCCTTGAC       |                             |
| <i>FABP4</i>                    | F-GAGGCGGATGAGAACAAGCA      | NM024406.3                  |
|                                 | R-CTCCCAGCAGCTACCATGGA      |                             |
| <i>FAS</i>                      | F-CACAATGGACCCCCAGCTT       | NM007988.3                  |
|                                 | R-AGACGCCAGGTTTCGTTTCCT     |                             |
| <i>HSL</i>                      | F-CTCATGGCTCAACTCCTTCCTG    | NM010719.5                  |
|                                 | R-TGCCTCAGACACACTCCTGC      |                             |
| <i>PPAR<math>\gamma</math></i>  | F-TCTCCTGTTGACCCAGAGCAT     | NM001174097.2               |
|                                 | R-TGGGCCAGAATGGCATCT        |                             |
